# Supplementary material
Source: publisher site journal article supplement (https://en-cdn.bio-protocol.org/attached/file/20201227/Supplementary%20Material%201.docx)
Supplement: Supplementary file 1 [file Supplementary%20Material%201.docx]

| Cells | Passage Nr. | Seeding density | Medium | Volume/chip |
| --- | --- | --- | --- | --- |
|  |  |  |  |  |
|  |  |  |  |  |
|  |  |  |  |  |

| Matrix | Volume/chip | Company | Catalog # | Lot # |
| --- | --- | --- | --- | --- |
|  |  |  |  |  |
|  |  |  |  |  |
|  |  |  |  |  |

| Pipet | Electronic pipet | | Repeating pipet (0.1/0.2 tip) |
| --- | --- | --- | --- |
| Perfusion settings | Static | Rocker Angle/interval min: | |
| Experiment | 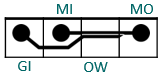 | | |

|  | 1 | 2 | 3 | 4 | 5 | 6 | 7 | 8 | 9 | 10 | 11 | 12 | 13 | 14 | 15 | 16 | 17 | 18 | 19 | 20 | 21 | 22 | 23 | 24 |
| --- | --- | --- | --- | --- | --- | --- | --- | --- | --- | --- | --- | --- | --- | --- | --- | --- | --- | --- | --- | --- | --- | --- | --- | --- |
|  | 1 | | | | 2 | | | | 3 | | | | 4 | | | | 5 | | | | 6 | | | |
| A | A03 | | | | A07 | | | | A11 | | | | A15 | | | | A19 | | | | A23 | | | |
| B | B03 | | | | B07 | | | | B11 | | | | B15 | | | | B19 | | | | B23 | | | |
| C | C03 | | | | C07 | | | | C11 | | | | C15 | | | | C19 | | | | C23 | | | |
| D | D03 | | | | D07 | | | | D11 | | | | D15 | | | | D19 | | | | D23 | | | |
| E | E03 | | | | E07 | | | | E11 | | | | E15 | | | | E19 | | | | E23 | | | |
| F | F03 | | | | F07 | | | | F11 | | | | F15 | | | | F19 | | | | F23 | | | |
| G | G03 | | | | G07 | | | | G11 | | | | G15 | | | | G19 | | | | G23 | | | |
| H | H03 | | | | H07 | | | | H11 | | | | H15 | | | | H19 | | | | H23 | | | |
| I | I03 | | | | I07 | | | | I11 | | | | I15 | | | | I19 | | | | I23 | | | |
| J | J03 | | | | J07 | | | | J11 | | | | J15 | | | | J19 | | | | J23 | | | |
| K | K03 | | | | K07 | | | | K11 | | | | K15 | | | | K19 | | | | K23 | | | |
| L | L03 | | | | L07 | | | | L11 | | | | L15 | | | | L19 | | | | L23 | | | |
| M | M03 | | | | M07 | | | | M11 | | | | M15 | | | | M19 | | | | M23 | | | |
| N | N03 | | | | N07 | | | | N11 | | | | N15 | | | | N19 | | | | N23 | | | |
| O | O03 | | | | O07 | | | | O11 | | | | O15 | | | | O19 | | | | O23 | | | |
| P | P03 | | | | P07 | | | | P11 | | | | P15 | | | | P19 | | | | P23 | | | |

L = Leaking ; Of = Overflow ; Nte = Not till end ; E = Empty

Notes: _________________________________________________________________________________________

_______________________________________________________________________________________________

_______________________________________________________________________________________________

_______________________________________________________________________________________________

_______________________________________________________________________________________________

_______________________________________________________________________________________________

_______________________________________________________________________________________________

_______________________________________________________________________________________________

_______________________________________________________________________________________________

_______________________________________________________________________________________________

_______________________________________________________________________________________________
